# Supplementary material
Source: publisher figshare collection journal article supplement (https://acs.figshare.com/ndownloader/files/13039919)
Supplement: Supplementary file 1 [file 13039919]

## KINOMEscan™ Profiling Service

### Primary Screen Report

| Compound Name | Screening Conc (nM) |
|---------------|---------------------|
| JA-1-58       | 10000               |

Requester: Glenn Micalizio

Company: Dartmouth University

Study Date: 03/02/2018

Report Date: 03/04/2018

Quote ID: MAXXP11269A

Order ID: DTM003-01-p-00001

Product: scanMAX

Number of Targets Tested: 468

Compounds Screened: 1



Jeremy Hunt  
Director of Screening  
[jhunt@discoverx.com](mailto:jhunt@discoverx.com)  
(858) 224-6927 office  
(858) 630-4600 fax

LeadHunter™ Discovery Services  
DiscoverX Corporation  
42501 Albrae Street  
Fremont, CA 94538-3142  
[www.discoverx.com](http://www.discoverx.com)

## Technology Overview

The KINOMEscan™ screening platform employs a novel and proprietary active site-directed competition binding assay to quantitatively measure interactions between test compounds and more than 450 human kinases and disease relevant mutant variants. This robust and reliable assay technology affords investigators the ability to extensively annotate compounds with accurate, precise and reproducible data. KINOMEscan™ assays do not require ATP and thereby report true thermodynamic interaction affinities, as opposed to IC50 values, which can depend on the ATP concentration.

## How KINOMEscan™ Works

Compounds that bind the kinase active site and directly (sterically) or indirectly (allosterically) prevent kinase binding to the immobilized ligand, will reduce the amount of kinase captured on the solid support (A & B). Conversely, test molecules that do not bind the kinase have no effect on the amount of kinase captured on the solid support (C). Screening "hits" are identified by measuring the amount of kinase captured in test versus control samples by using a quantitative, precise and ultra-sensitive qPCR method that detects the associated DNA label (D). In a similar manner, dissociation constants (K<sub>d</sub>s) for test compound-kinase interactions are calculated by measuring the amount of kinase captured on the solid support as a function of the test compound concentration.

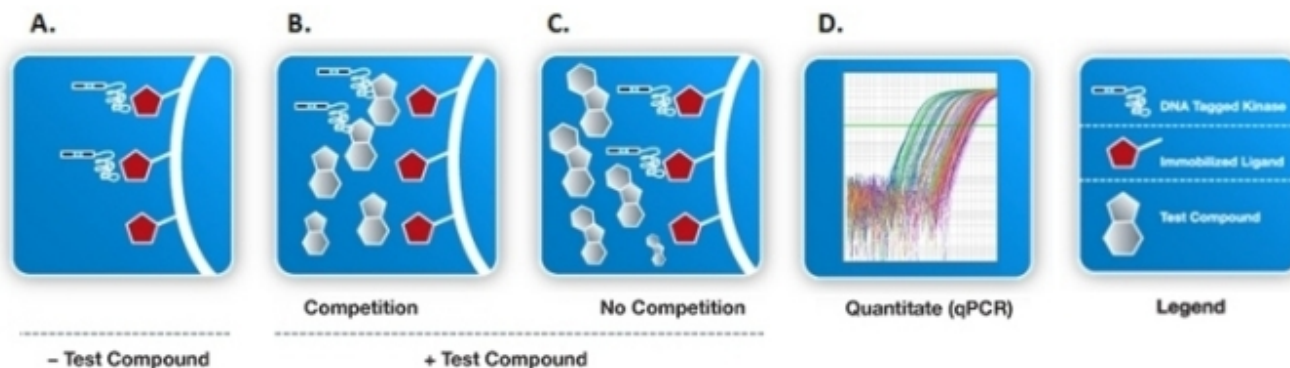

## Protocol Description

**Kinase assays.** For most assays, kinase-tagged T7 phage strains were grown in parallel in 24-well blocks in an *E. coli* host derived from the BL21 strain. *E. coli* were grown to log-phase and infected with T7 phage from a frozen stock (multiplicity of infection = 0.4) and incubated with shaking at 32°C until lysis (90-150 minutes). The lysates were centrifuged (6,000 x g) and filtered (0.2µm) to remove cell debris. The remaining kinases were produced in HEK-293 cells and subsequently tagged with DNA for qPCR detection. Streptavidin-coated magnetic beads were treated with biotinylated small molecule ligands for 30 minutes at room temperature to generate affinity resins for kinase assays. The liganded beads were blocked with excess biotin and washed with blocking buffer (SeaBlock (Pierce), 1 % BSA, 0.05 % Tween 20, 1 mM DTT) to remove unbound ligand and to reduce non-specific phage binding. Binding reactions were assembled by combining kinases, liganded affinity beads, and test compounds in 1x binding buffer (20 % SeaBlock, 0.17x PBS, 0.05 % Tween 20, 6 mM DTT). Test compounds were prepared as 40x stocks in 100% DMSO and directly diluted into the assay. All reactions were performed in polypropylene 384-well plates in a final volume of 0.02 ml. The assay plates were incubated at room temperature with shaking for 1 hour and the affinity beads were washed with wash buffer (1x PBS, 0.05 % Tween 20). The beads were then re-suspended in elution buffer (1x PBS, 0.05 % Tween 20, 0.5 µM non-biotinylated affinity ligand) and incubated at room temperature with shaking for 30 minutes. The kinase concentration in the eluates was measured by qPCR.

## Percent Control (%Ctrl)

The compound(s) were screened at the concentration(s) requested, and results for primary screen binding interactions are reported as '% Ctrl', where lower numbers indicate stronger hits in the matrix on the following page(s).

## %Ctrl Calculation

$$\left[ \frac{\text{test compound signal} - \text{positive control signal}}{\text{negative control signal} - \text{positive control signal}} \right] \times 100$$

*test compound* = compound submitted by Dartmouth University

*negative control* = DMSO (100%Ctrl)

*positive control* = control compound (0%Ctrl)

## Relationship between Binding Constant Distributions (Kds) & Single Concentration Primary Screen Values

Based on screening data from thousands of profiled compounds, a proportional relationship between primary screening results and corresponding compound/target affinities may be described. Evident in the correlation graph below is a range of binding constants (Kd values) for the indicated ranges of POC values with tighter binding (higher affinity) interactions associated with lower POC values and weaker binding (lower affinity) associated with higher POC values. This distribution of binding constants is characteristic of single concentration primary screens and underscores the importance of following up observed 'hits' or apparent high affinity interactions with quantitative binding constant determinations.

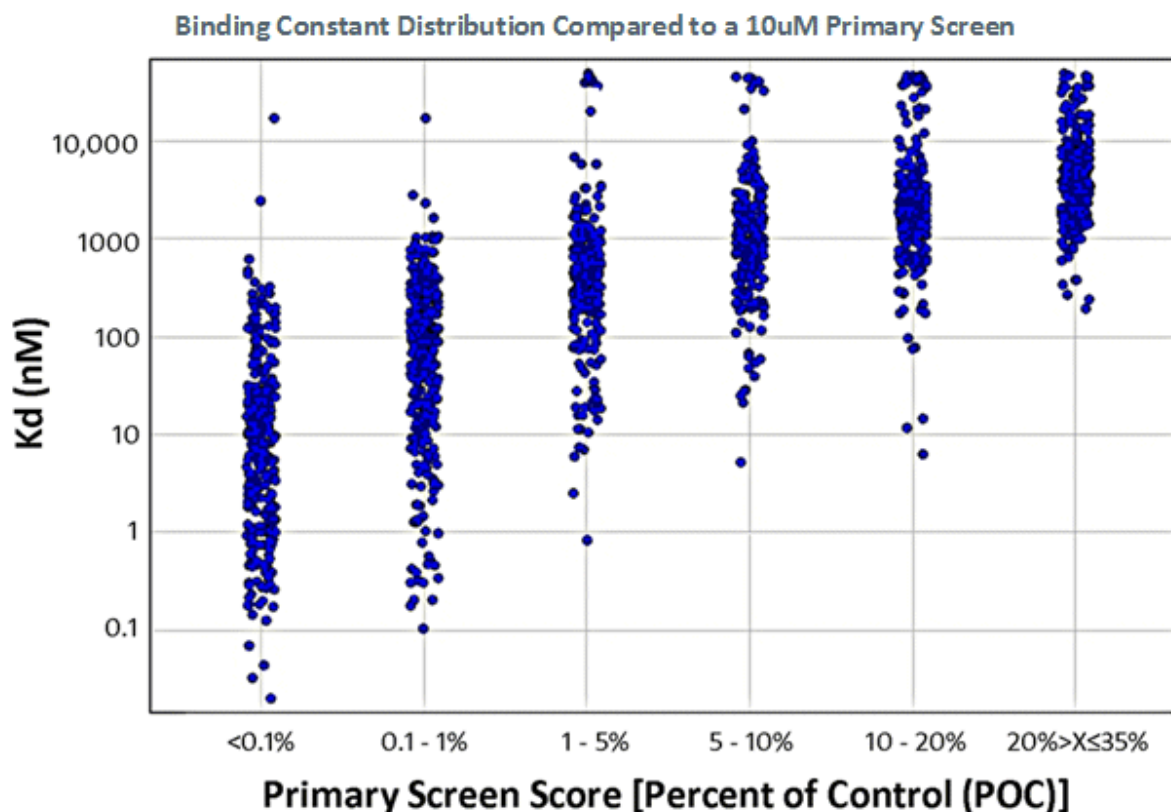

Data correlation between primary screening (10μM concentration) and binding constants (Kd values). Binding constants are correlated with primary screening results, where lower POC values are associated with low Kd values (higher affinity interactions).

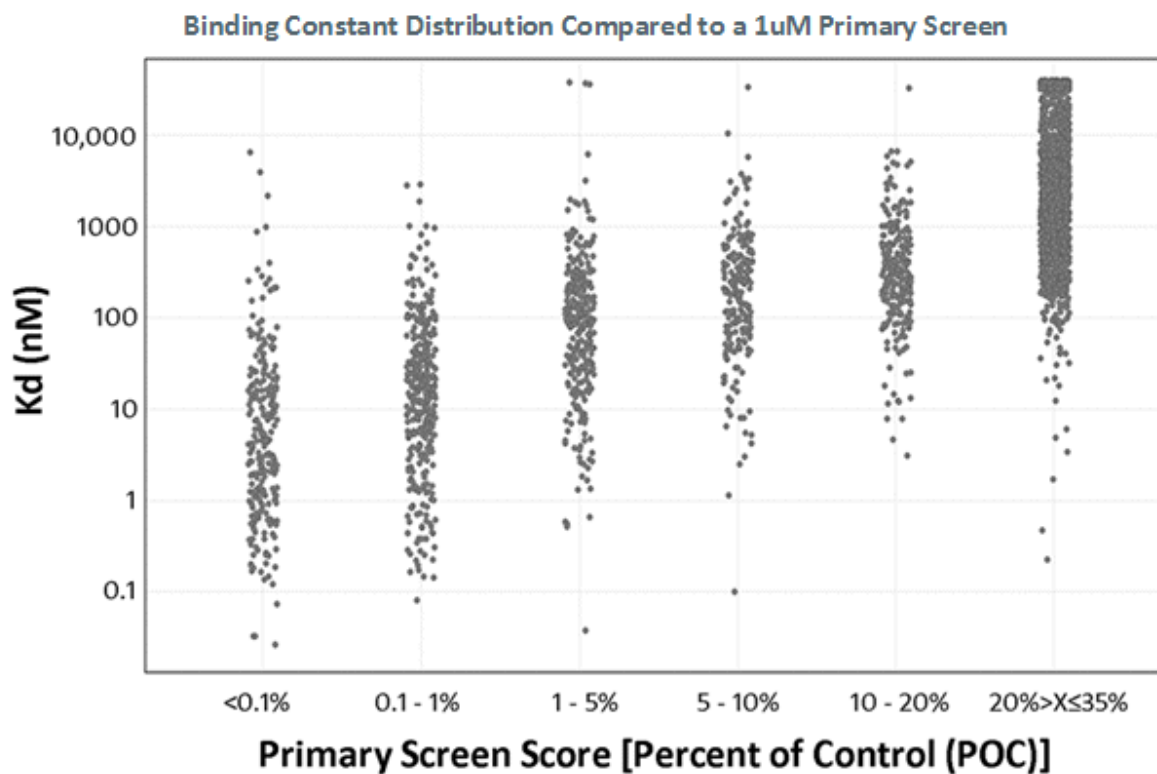

Data correlation between primary screening (1 $\mu$ M concentration) and binding constants ( $K_d$  values). Binding constants are correlated with primary screening results, where lower POC values are associated with low  $K_d$  values (higher affinity interactions).

## Selectivity Score (S-scores)

Selectivity Score or S-score is a quantitative measure of compound selectivity. It is calculated by dividing the number of kinases that compounds bind to by the total number of distinct kinases tested, excluding mutant variants.

$$S = \text{Number of hits} / \text{Number of assays}$$

This value can be calculated using %Ctrl as a potency threshold (below) and provides a quantitative method of describing compound selectivity to facilitate comparison of different compounds.

$$S(35) = (\text{number of non-mutant kinases with \%Ctrl} < 35) / (\text{number of non-mutant kinases tested})$$

$$S(10) = (\text{number of non-mutant kinases with \%Ctrl} < 10) / (\text{number of non-mutant kinases tested})$$

$$S(1) = (\text{number of non-mutant kinases with \%Ctrl} < 1) / (\text{number of non-mutant kinases tested})$$

## Using S-Score Data to Quantitate Selectivity

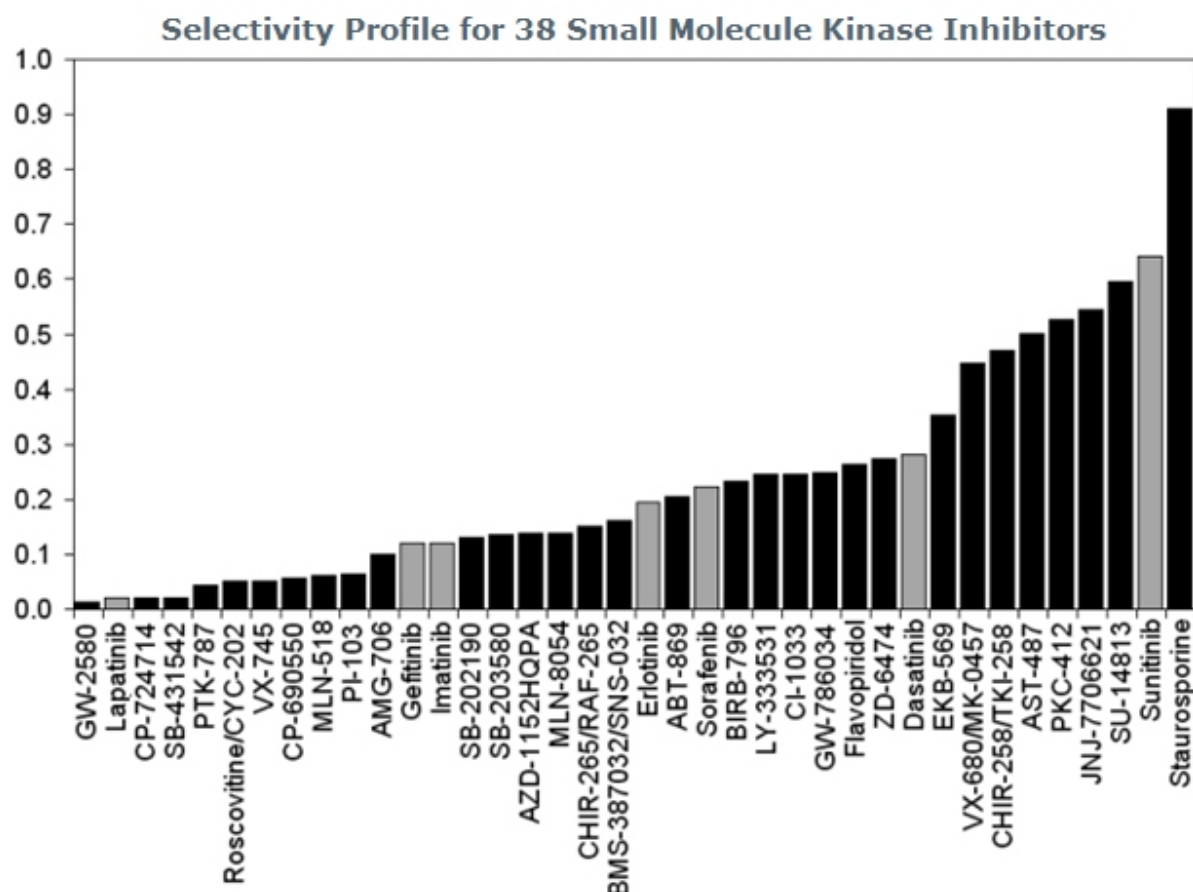

KINOMEScan's *in vitro* competition binding assay was used to evaluate 38 kinase inhibitors against a panel of 287 distinct human protein kinases (~55% of the predicted human protein kinome), and three lipid kinases. The compounds tested included 21 tyrosine kinase inhibitors, 15 serine-threonine kinase inhibitors, 1 lipid kinase inhibitor and staurosporine.  $S(35) = (\text{number of non-mutant kinases with \%Ctrl} < 35) / (290 \text{ kinases tested}; 27 \text{ mutant variants were excluded from this analysis})$ . Compounds approved for use in humans (as of August, 2007) are highlighted (gray bars).

## References

KINOMEScan™ and BROMOScan™ use the same assay technology. For a more detailed description of this assay technology, see:

- Fabian, M.A. *et al.* A small molecule-kinase interaction map for clinical kinase inhibitors. *Nat. Biotechnol.* 23, 329-336 (2005).

To view kinase interaction maps for 38 well-known kinase inhibitors and a more detailed discussion of selectivity scores, see:

- Karaman, M.W. *et al.* A quantitative analysis of kinase inhibitor selectivity. *Nat. Biotechnol.* 26, 127-132 (2008).

Select publications are available at [www.discoverx.com](http://www.discoverx.com).

## DTM003-01-p-00001 Study Results

Table 1 - Matrix of Compound Screen for DTM003-01-p-00001

| Target                        | JA-1-58        |
|-------------------------------|----------------|
| Gene Symbol                   | %Ctrl @ 1000nM |
| AAK1                          | 37             |
| ABL1(E255K)-phosphorylated    | 67             |
| ABL1(F317I)-nonphosphorylated | 77             |
| ABL1(F317I)-phosphorylated    | 73             |
| ABL1(F317L)-nonphosphorylated | 85             |
| ABL1(F317L)-phosphorylated    | 86             |
| ABL1(H396P)-nonphosphorylated | 63             |
| ABL1(H396P)-phosphorylated    | 73             |
| ABL1(M351T)-phosphorylated    | 87             |
| ABL1(Q252H)-nonphosphorylated | 49             |
| ABL1(Q252H)-phosphorylated    | 100            |
| ABL1(T315I)-nonphosphorylated | 86             |
| ABL1(T315I)-phosphorylated    | 72             |
| ABL1(Y253F)-phosphorylated    | 88             |
| ABL1-nonphosphorylated        | 88             |
| ABL1-phosphorylated           | 85             |
| ABL2                          | 98             |
| ACVR1                         | 89             |
| ACVR1B                        | 83             |
| ACVR2A                        | 95             |
| ACVR2B                        | 100            |
| ACVRL1                        | 95             |
| ADCK3                         | 83             |
| ADCK4                         | 100            |
| AKT1                          | 87             |
| AKT2                          | 100            |
| AKT3                          | 94             |
| ALK                           | 95             |
| ALK(C1156Y)                   | 72             |
| ALK(L1196M)                   | 81             |
| AMPK-alpha1                   | 100            |
| AMPK-alpha2                   | 83             |
| ANKK1                         | 55             |
| ARK5                          | 92             |
| ASK1                          | 100            |
| ASK2                          | 93             |
| AURKA                         | 100            |
| AURKB                         | 76             |
| AURKC                         | 87             |
| AXL                           | 82             |
| BIKE                          | 36             |
| BLK                           | 100            |
| BMPR1A                        | 86             |
| BMPR1B                        | 68             |
| BMPR2                         | 78             |
| BMX                           | 100            |
| BRAF                          | 92             |
| BRAF(V600E)                   | 90             |

Table 1 - Assay Matrix (continued).

| Target              | JA-1-58        |
|---------------------|----------------|
| Gene Symbol         | %Ctrl @ 1000nM |
| BRK                 | 87             |
| BRSK1               | 88             |
| BRSK2               | 93             |
| BTK                 | 100            |
| BUB1                | 93             |
| CAMK1               | 90             |
| CAMK1B              | 74             |
| CAMK1D              | 96             |
| CAMK1G              | 95             |
| CAMK2A              | 63             |
| CAMK2B              | 72             |
| CAMK2D              | 87             |
| CAMK2G              | 98             |
| CAMK4               | 66             |
| CAMKK1              | 99             |
| CAMKK2              | 96             |
| CASK                | 55             |
| CDC2L1              | 100            |
| CDC2L2              | 97             |
| CDC2L5              | 73             |
| CDK11               | 60             |
| CDK2                | 82             |
| CDK3                | 100            |
| CDK4                | 96             |
| CDK4-cyclinD1       | 84             |
| CDK4-cyclinD3       | 82             |
| CDK5                | 93             |
| CDK7                | 65             |
| CDK8                | 87             |
| CDK9                | 93             |
| CDKL1               | 91             |
| CDKL2               | 97             |
| CDKL3               | 74             |
| CDKL5               | 86             |
| CHEK1               | 95             |
| CHEK2               | 89             |
| CIT                 | 86             |
| CLK1                | 8.2            |
| CLK2                | 4.7            |
| CLK3                | 73             |
| CLK4                | 3.9            |
| CSF1R               | 100            |
| CSF1R-autoinhibited | 61             |
| CSK                 | 96             |
| CSNK1A1             | 82             |
| CSNK1A1L            | 100            |
| CSNK1D              | 81             |
| CSNK1E              | 96             |
| CSNK1G1             | 100            |

Table 1 - Assay Matrix (continued).

| Target                    | JA-1-58        |
|---------------------------|----------------|
| Gene Symbol               | %Ctrl @ 1000nM |
| CSNK1G2                   | 80             |
| CSNK1G3                   | 96             |
| CSNK2A1                   | 44             |
| CSNK2A2                   | 51             |
| CTK                       | 61             |
| DAPK1                     | 81             |
| DAPK2                     | 73             |
| DAPK3                     | 67             |
| DCAMKL1                   | 79             |
| DCAMKL2                   | 95             |
| DCAMKL3                   | 68             |
| DDR1                      | 93             |
| DDR2                      | 69             |
| DLK                       | 81             |
| DMPK                      | 76             |
| DMPK2                     | 89             |
| DRAK1                     | 76             |
| DRAK2                     | 71             |
| DYRK1A                    | 11             |
| DYRK1B                    | 30             |
| DYRK2                     | 67             |
| EGFR                      | 82             |
| EGFR(E746-A750del)        | 89             |
| EGFR(G719C)               | 90             |
| EGFR(G719S)               | 93             |
| EGFR(L747-E749del, A750P) | 84             |
| EGFR(L747-S752del, P753S) | 75             |
| EGFR(L747-T751del,Sins)   | 80             |
| EGFR(L858R)               | 86             |
| EGFR(L858R, T790M)        | 83             |
| EGFR(L861Q)               | 76             |
| EGFR(S752-I759del)        | 89             |
| EGFR(T790M)               | 90             |
| EIF2AK1                   | 64             |
| EPHA1                     | 83             |
| EPHA2                     | 90             |
| EPHA3                     | 89             |
| EPHA4                     | 90             |
| EPHA5                     | 94             |
| EPHA6                     | 83             |
| EPHA7                     | 96             |
| EPHA8                     | 96             |
| EPHB1                     | 98             |
| EPHB2                     | 78             |
| EPHB3                     | 87             |
| EPHB4                     | 89             |
| EPHB6                     | 76             |
| ERBB2                     | 85             |
| ERBB3                     | 92             |



Table 1 - Assay Matrix (continued).

| Target                | JA-1-58        |
|-----------------------|----------------|
| Gene Symbol           | %Ctrl @ 1000nM |
| ERBB4                 | 100            |
| ERK1                  | 85             |
| ERK2                  | 93             |
| ERK3                  | 78             |
| ERK4                  | 98             |
| ERK5                  | 99             |
| ERK8                  | 76             |
| ERN1                  | 73             |
| FAK                   | 87             |
| FER                   | 87             |
| FES                   | 85             |
| FGFR1                 | 86             |
| FGFR2                 | 94             |
| FGFR3                 | 90             |
| FGFR3(G697C)          | 81             |
| FGFR4                 | 100            |
| FGR                   | 80             |
| FLT1                  | 95             |
| FLT3                  | 94             |
| FLT3(D835H)           | 66             |
| FLT3(D835V)           | 0              |
| FLT3(D835Y)           | 45             |
| FLT3(ITD)             | 86             |
| FLT3(ITD,D835V)       | 49             |
| FLT3(ITD,F691L)       | 72             |
| FLT3(K663Q)           | 83             |
| FLT3(N841I)           | 82             |
| FLT3(R834Q)           | 71             |
| FLT3-autoinhibited    | 74             |
| FLT4                  | 90             |
| FRK                   | 94             |
| FYN                   | 80             |
| GAK                   | 59             |
| GCN2(Kin.Dom.2,S808G) | 96             |
| GRK1                  | 66             |
| GRK2                  | 99             |
| GRK3                  | 36             |
| GRK4                  | 69             |
| GRK7                  | 79             |
| GSK3A                 | 83             |
| GSK3B                 | 78             |
| HASPIN                | 34             |
| HCK                   | 100            |
| HIPK1                 | 33             |
| HIPK2                 | 46             |
| HIPK3                 | 51             |
| HIPK4                 | 68             |
| HPK1                  | 86             |
| HUNK                  | 100            |

Table 1 - Assay Matrix (continued).

| Target                       | JA-1-58        |
|------------------------------|----------------|
| Gene Symbol                  | %Ctrl @ 1000nM |
| ICK                          | 71             |
| IGF1R                        | 83             |
| IKK-alpha                    | 64             |
| IKK-beta                     | 65             |
| IKK-epsilon                  | 71             |
| INSR                         | 91             |
| INSRR                        | 100            |
| IRAK1                        | 45             |
| IRAK3                        | 49             |
| IRAK4                        | 53             |
| ITK                          | 100            |
| JAK1(JH1domain-catalytic)    | 100            |
| JAK1(JH2domain-pseudokinase) | 22             |
| JAK2(JH1domain-catalytic)    | 12             |
| JAK3(JH1domain-catalytic)    | 28             |
| JNK1                         | 53             |
| JNK2                         | 94             |
| JNK3                         | 91             |
| KIT                          | 96             |
| KIT(A829P)                   | 79             |
| KIT(D816H)                   | 12             |
| KIT(D816V)                   | 85             |
| KIT(L576P)                   | 94             |
| KIT(V559D)                   | 94             |
| KIT(V559D,T670I)             | 92             |
| KIT(V559D,V654A)             | 100            |
| KIT-autoinhibited            | 69             |
| LATS1                        | 76             |
| LATS2                        | 6.6            |
| LCK                          | 92             |
| LIMK1                        | 91             |
| LIMK2                        | 91             |
| LKB1                         | 100            |
| LOK                          | 99             |
| LRRK2                        | 69             |
| LRRK2(G2019S)                | 79             |
| LTK                          | 76             |
| LYN                          | 78             |
| LZK                          | 52             |
| MAK                          | 58             |
| MAP3K1                       | 64             |
| MAP3K15                      | 86             |
| MAP3K2                       | 76             |
| MAP3K3                       | 60             |
| MAP3K4                       | 77             |
| MAP4K2                       | 87             |
| MAP4K3                       | 100            |
| MAP4K4                       | 92             |
| MAP4K5                       | 95             |

Table 1 - Assay Matrix (continued).

| Target      | JA-1-58         |
|-------------|-----------------|
| Gene Symbol | %Ctrl @ 10000nM |
| MAPKAPK2    | 100             |
| MAPKAPK5    | 52              |
| MARK1       | 88              |
| MARK2       | 82              |
| MARK3       | 100             |
| MARK4       | 91              |
| MAST1       | 83              |
| MEK1        | 66              |
| MEK2        | 62              |
| MEK3        | 47              |
| MEK4        | 93              |
| MEK5        | 44              |
| MEK6        | 73              |
| MELK        | 91              |
| MERTK       | 94              |
| MET         | 86              |
| MET(M1250T) | 83              |
| MET(Y1235D) | 94              |
| MINK        | 75              |
| MKK7        | 94              |
| MKNK1       | 100             |
| MKNK2       | 62              |
| MLCK        | 100             |
| MLK1        | 82              |
| MLK2        | 64              |
| MLK3        | 90              |
| MRCKA       | 100             |
| MRCKB       | 100             |
| MST1        | 100             |
| MST1R       | 77              |
| MST2        | 67              |
| MST3        | 92              |
| MST4        | 77              |
| MTOR        | 78              |
| MUSK        | 100             |
| MYLK        | 59              |
| MYLK2       | 98              |
| MYLK4       | 83              |
| MYO3A       | 91              |
| MYO3B       | 100             |
| NDR1        | 81              |
| NDR2        | 95              |
| NEK1        | 84              |
| NEK10       | 56              |
| NEK11       | 100             |
| NEK2        | 93              |
| NEK3        | 81              |
| NEK4        | 100             |
| NEK5        | 78              |

Table 1 - Assay Matrix (continued).

| Target                | JA-1-58        |
|-----------------------|----------------|
| Gene Symbol           | %Ctrl @ 1000nM |
| NEK6                  | 94             |
| NEK7                  | 81             |
| NEK9                  | 92             |
| NIK                   | 74             |
| NIM1                  | 100            |
| NLK                   | 98             |
| OSR1                  | 52             |
| p38-alpha             | 91             |
| p38-beta              | 84             |
| p38-delta             | 71             |
| p38-gamma             | 89             |
| PAK1                  | 95             |
| PAK2                  | 91             |
| PAK3                  | 93             |
| PAK4                  | 100            |
| PAK6                  | 98             |
| PAK7                  | 94             |
| PCTK1                 | 72             |
| PCTK2                 | 90             |
| PCTK3                 | 82             |
| PDGFRA                | 72             |
| PDGFRB                | 93             |
| PDPK1                 | 90             |
| PFCDPK1(P.falciparum) | 61             |
| PFFPK5(P.falciparum)  | 66             |
| PFTAIRE2              | 90             |
| PFTK1                 | 92             |
| PHKG1                 | 84             |
| PHKG2                 | 69             |
| PIK3C2B               | 83             |
| PIK3C2G               | 55             |
| PIK3CA                | 87             |
| PIK3CA(C420R)         | 77             |
| PIK3CA(E542K)         | 80             |
| PIK3CA(E545A)         | 70             |
| PIK3CA(E545K)         | 83             |
| PIK3CA(H1047L)        | 82             |
| PIK3CA(H1047Y)        | 89             |
| PIK3CA(I800L)         | 49             |
| PIK3CA(M1043I)        | 97             |
| PIK3CA(Q546K)         | 66             |
| PIK3CB                | 44             |
| PIK3CD                | 92             |
| PIK3CG                | 73             |
| PIK4CB                | 39             |
| PIKFYVE               | 50             |
| PIM1                  | 59             |
| PIM2                  | 14             |
| PIM3                  | 71             |

Table 1 - Assay Matrix (continued).

| Target                        | JA-1-58         |
|-------------------------------|-----------------|
| Gene Symbol                   | %Ctrl @ 10000nM |
| PIP5K1A                       | 64              |
| PIP5K1C                       | 55              |
| PIP5K2B                       | 100             |
| PIP5K2C                       | 57              |
| PKAC-alpha                    | 79              |
| PKAC-beta                     | 100             |
| PKMYT1                        | 94              |
| PKN1                          | 81              |
| PKN2                          | 85              |
| PKNB(M.tuberculosis)          | 79              |
| PLK1                          | 100             |
| PLK2                          | 89              |
| PLK3                          | 69              |
| PLK4                          | 65              |
| PRKCD                         | 74              |
| PRKCE                         | 46              |
| PRKCH                         | 92              |
| PRKCI                         | 62              |
| PRKCQ                         | 74              |
| PRKD1                         | 97              |
| PRKD2                         | 100             |
| PRKD3                         | 79              |
| PRKG1                         | 71              |
| PRKG2                         | 67              |
| PRKR                          | 87              |
| PRKX                          | 81              |
| PRP4                          | 63              |
| PYK2                          | 100             |
| QSK                           | 84              |
| RAF1                          | 96              |
| RET                           | 86              |
| RET(M918T)                    | 99              |
| RET(V804L)                    | 94              |
| RET(V804M)                    | 82              |
| RIOK1                         | 61              |
| RIOK2                         | 63              |
| RIOK3                         | 81              |
| RIPK1                         | 84              |
| RIPK2                         | 94              |
| RIPK4                         | 61              |
| RIPK5                         | 67              |
| ROCK1                         | 33              |
| ROCK2                         | 40              |
| ROS1                          | 84              |
| RPS6KA4(Kin.Dom.1-N-terminal) | 90              |
| RPS6KA4(Kin.Dom.2-C-terminal) | 72              |
| RPS6KA5(Kin.Dom.1-N-terminal) | 84              |
| RPS6KA5(Kin.Dom.2-C-terminal) | 85              |
| RSK1(Kin.Dom.1-N-terminal)    | 100             |

Table 1 - Assay Matrix (continued).

| Target                     | JA-1-58         |
|----------------------------|-----------------|
| Gene Symbol                | %Ctrl @ 10000nM |
| RSK1(Kin.Dom.2-C-terminal) | 58              |
| RSK2(Kin.Dom.1-N-terminal) | 46              |
| RSK2(Kin.Dom.2-C-terminal) | 76              |
| RSK3(Kin.Dom.1-N-terminal) | 84              |
| RSK3(Kin.Dom.2-C-terminal) | 83              |
| RSK4(Kin.Dom.1-N-terminal) | 73              |
| RSK4(Kin.Dom.2-C-terminal) | 78              |
| S6K1                       | 60              |
| SBK1                       | 62              |
| SGK                        | 67              |
| SgK110                     | 100             |
| SGK2                       | 55              |
| SGK3                       | 57              |
| SIK                        | 97              |
| SIK2                       | 93              |
| SLK                        | 97              |
| SNARK                      | 76              |
| SNRK                       | 73              |
| SRC                        | 84              |
| SRMS                       | 90              |
| SRPK1                      | 69              |
| SRPK2                      | 68              |
| SRPK3                      | 70              |
| STK16                      | 91              |
| STK33                      | 90              |
| STK35                      | 99              |
| STK36                      | 71              |
| STK39                      | 77              |
| SYK                        | 89              |
| TAK1                       | 69              |
| TAOK1                      | 72              |
| TAOK2                      | 99              |
| TAOK3                      | 83              |
| TBK1                       | 76              |
| TEC                        | 99              |
| TESK1                      | 87              |
| TGFBR1                     | 85              |
| TGFBR2                     | 86              |
| TIE1                       | 100             |
| TIE2                       | 84              |
| TLK1                       | 74              |
| TLK2                       | 90              |
| TNIK                       | 98              |
| TNK1                       | 67              |
| TNK2                       | 90              |
| TNNI3K                     | 82              |
| TRKA                       | 71              |
| TRKB                       | 54              |
| TRKC                       | 79              |

Table 1 - Assay Matrix (continued).

| Target                       | JA-1-58         |
|------------------------------|-----------------|
| Gene Symbol                  | %Ctrl @ 10000nM |
| TRPM6                        | 100             |
| TSSK1B                       | 97              |
| TSSK3                        | 87              |
| TTK                          | 80              |
| TXK                          | 93              |
| TYK2(JH1domain-catalytic)    | 44              |
| TYK2(JH2domain-pseudokinase) | 67              |
| TYRO3                        | 87              |
| ULK1                         | 63              |
| ULK2                         | 69              |
| ULK3                         | 85              |
| VEGFR2                       | 83              |
| VPS34                        | 63              |
| VRK2                         | 59              |
| WEE1                         | 100             |
| WEE2                         | 100             |
| WNK1                         | 84              |
| WNK2                         | 70              |
| WNK3                         | 100             |
| WNK4                         | 81              |
| YANK1                        | 73              |
| YANK2                        | 100             |
| YANK3                        | 98              |
| YES                          | 92              |
| YSK1                         | 83              |
| YSK4                         | 41              |
| ZAK                          | 91              |
| ZAP70                        | 100             |

%Ctrl Legend

|        |        |        |         |      |
|--------|--------|--------|---------|------|
| 0≤x<.1 | .1≤x<1 | 1≤x<10 | 10≤x<35 | x≥35 |
|--------|--------|--------|---------|------|

## S-score Results

Table 2 - S-score Table for DTM003-01-p-00001

| Compound Name | Selectivity Score Type | Number of Hits | Number of Non-Mutant Kinases | Screening Concentration (nM) | Selectivity Score |
|---------------|------------------------|----------------|------------------------------|------------------------------|-------------------|
| JA-1-58       | S(35)                  | 13             | 403                          | 10000                        | 0.032             |
| JA-1-58       | S(10)                  | 4              | 403                          | 10000                        | 0.01              |
| JA-1-58       | S(1)                   | 0              | 403                          | 10000                        | 0                 |



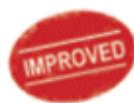

## TREEspot™ Interaction Maps - Now Includes Mutant, Lipid, Atypical & Pathogen Kinase Dendrograms

As part of our ongoing effort to provide customers with the best possible data analysis tools, KINOMEScan™ has developed an enhanced rendering of the human kinase dendrogram and allows, for the first time ever, to fully visualize compound interactions across our industry leading kinase panel, including clinically and biochemically relevant mutants, lipid, atypical, and pathogen kinases, plus a growing panel of activation-state specific assays.

TREEspot™ is an artistic representation of the human kinome phylogenetic tree based on extensive published research. We welcome your comments and feedback on this new visualization image. Please contact us at [info@discoverx.com](mailto:info@discoverx.com) to tell us what you think.

### Key Changes

- More uniform format and presentation
- Kinase groups more clearly delineated
- Updated nomenclature for kinases

TREEspot™ is a proprietary data visualization software tool developed by KINOMEScan. *Mutant and lipid kinases are not represented.* Kinases found to bind are marked with red circles, where larger circles indicate higher-affinity binding. Visualize data online and create your own high resolution TREEspot™ interaction maps with our easy-to-use compound profile visualization tool. [Instructions and login credentials provided below.](#)

Login: [treespot.discoverx.com](https://treespot.discoverx.com) -- Username: treespot! -- Password: guest037

Instructions: [treespot.discoverx.com/Help/TreeSpotHelpBasic.htm](https://treespot.discoverx.com/Help/TreeSpotHelpBasic.htm)

Table 3 - TREEspot™ Interaction Maps for DTM003-01-p-00001

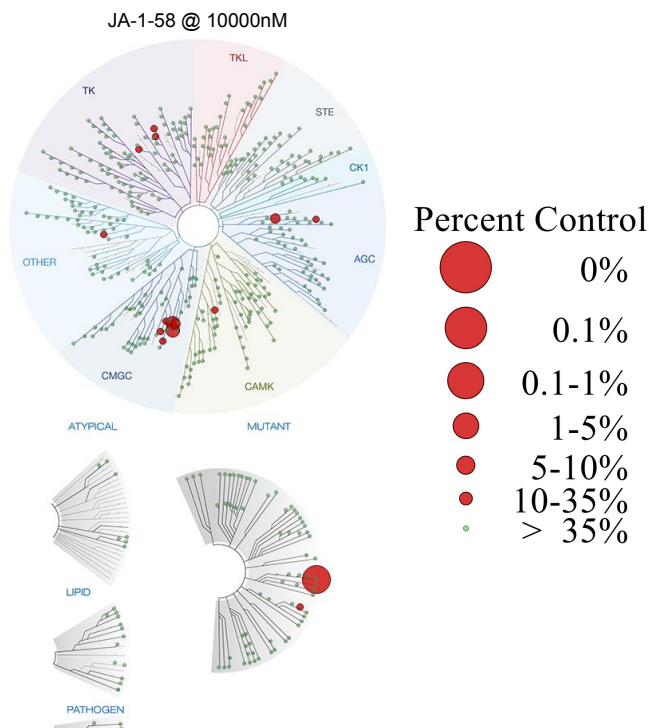

## Available Follow-up Screening Services

LeadHunter™ Discovery Services offers a suite of investigative tools that enable detailed biochemical characterization of the interaction between inhibitors and their targets. The thermodynamic, kinetic, and structural information provided by these tools enables a detailed comparison of inhibitors from common or distinct lead series and facilitates the interpretation of data from downstream cellular and *in vivo* pharmacology models. These services are now available for both kinases and for bromodomain-containing proteins.

---

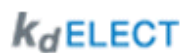

Obtain quantitative binding affinities for compound-kinase interactions

**KdELECT™** - a powerful follow up service to quantify binding affinity of compound-kinase interactions identified in primary (single concentration) screens. Inhibitor binding constants (Kd values) are calculated from duplicate 11-point dose-response curves under optimized conditions that generate true thermodynamic Kd values which facilitate direct comparison of inhibitor affinity across kinases.

[Learn more >>](#)

---

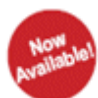

PathHunter® cell-based compound screening & profiling services

PathHunter inCell assays and screening services are a powerful follow up solution to KINOMEScan™ *in vitro* biochemical studies for obtaining the maximum level of information about inhibitor function, potency and selectivity in a more physiological context.
